# Supplementary material for: Morphology and field-effect transistor characteristics of semicrystalline poly(3-hexylthiophene) and poly(stearyl acrylate) blend nanowires
Source: Royal Society of Chemistry journal article supplement (doi:10.1039/c2jm31362f), 2012-01-01
Supplement: c2jm31362f.pdf [file c2jm31362f.pdf]

## Supplementary Information for

### Morphology and Field-Effect Transistor Characteristics of Crystalline Poly(3-hexylthiophene) and Poly(stearyl acrylate) Blend Nanowires

*Jung-Chuan Lin<sup>1</sup>, Wen-Ya Lee<sup>1</sup>, Hung-Chin Wu<sup>1</sup>, Chih-Chieh Chou<sup>2</sup>, Yu-Cheng Chiu<sup>1</sup>,  
Ya-Sen Sun<sup>\*3</sup>, and Wen-Chang Chen<sup>\*1</sup>*

<sup>1</sup>Department of Chemical Engineering  
National Taiwan University  
Taipei, 10617 Taiwan

<sup>2</sup>Institute of Polymer Science and Engineering  
National Taiwan University  
Taipei, 10617 Taiwan

<sup>3</sup>Department of Chemical and Materials Engineering,  
National Central University  
Taoyuan, 32001 Taiwan.

\*Corresponding authors. email: *Wen-Chang Chen* ([chenwc@ntu.edu.tw](mailto:chenwc@ntu.edu.tw))

*Ya-Sen Sun* ([yssun@cc.ncu.edu.tw](mailto:yssun@cc.ncu.edu.tw))

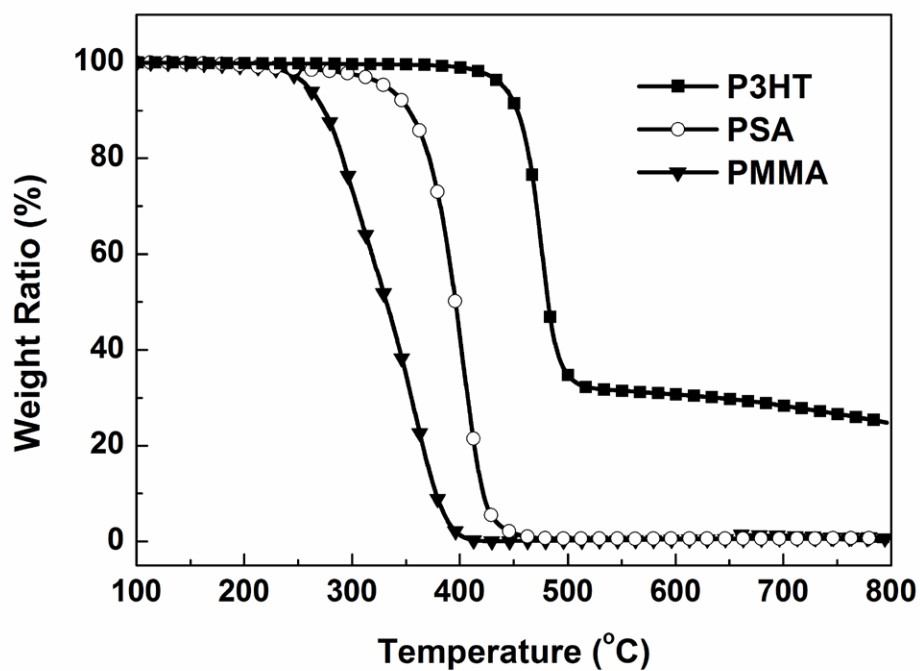

Fig. S1. TGA curves of P3HT, PSA, and PMMA at a heating rate of  $10\text{ }^{\circ}\text{C min}^{-1}$ .

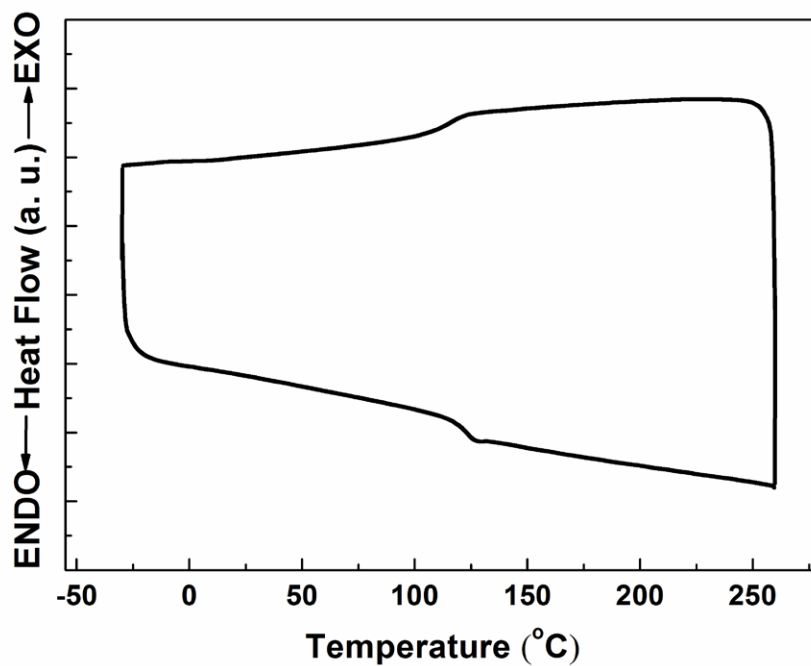

Fig. S2. DSC curves of PMMA at a heating rate of  $10\text{ }^{\circ}\text{C min}^{-1}$ .

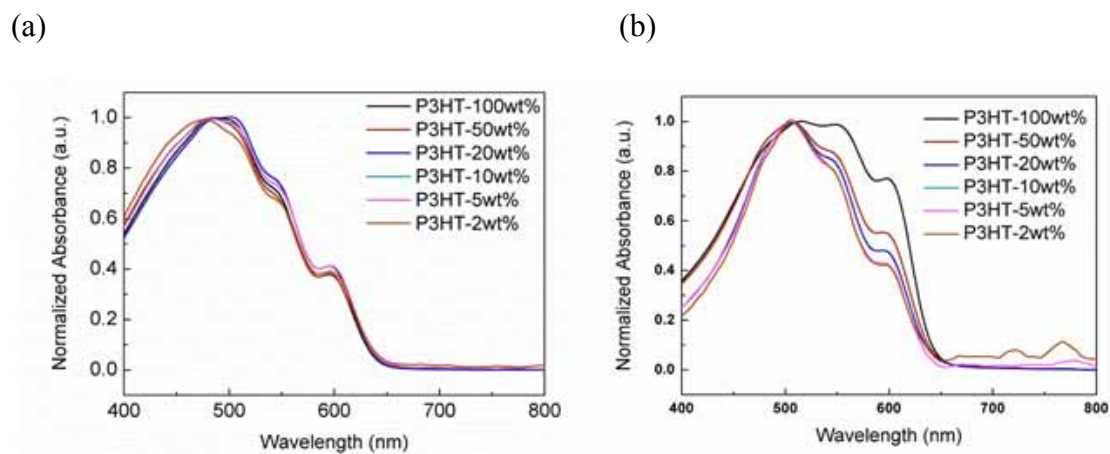

**Fig. S3.** UV-vis absorption spectra of P3HT/PMMA (a) in CH<sub>2</sub>Cl<sub>2</sub> and (b) thin film spin-coated from the CH<sub>2</sub>Cl<sub>2</sub> solution.

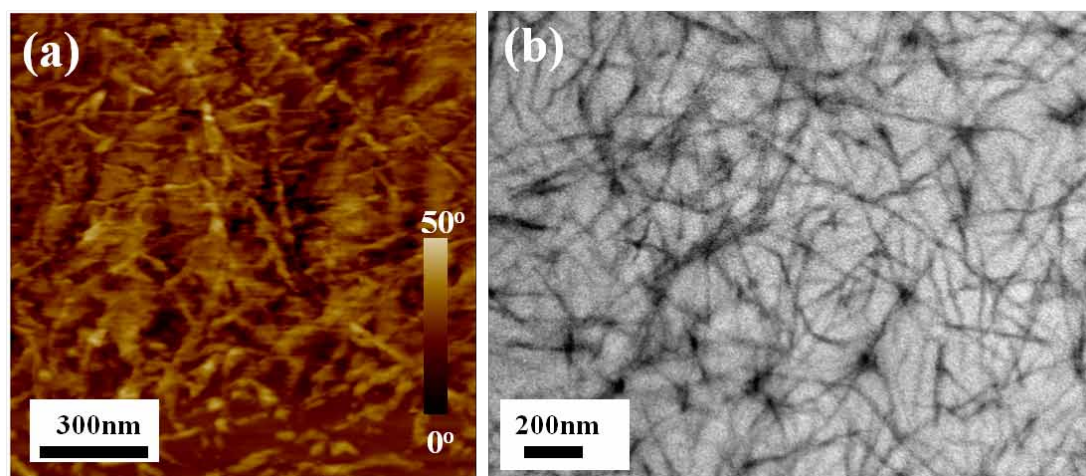

**Fig. S4.** (a) AFM and (b) TEM images of P3HT/PSA blends prepared from CH<sub>2</sub>Cl<sub>2</sub> using 20 wt% of P3HT.

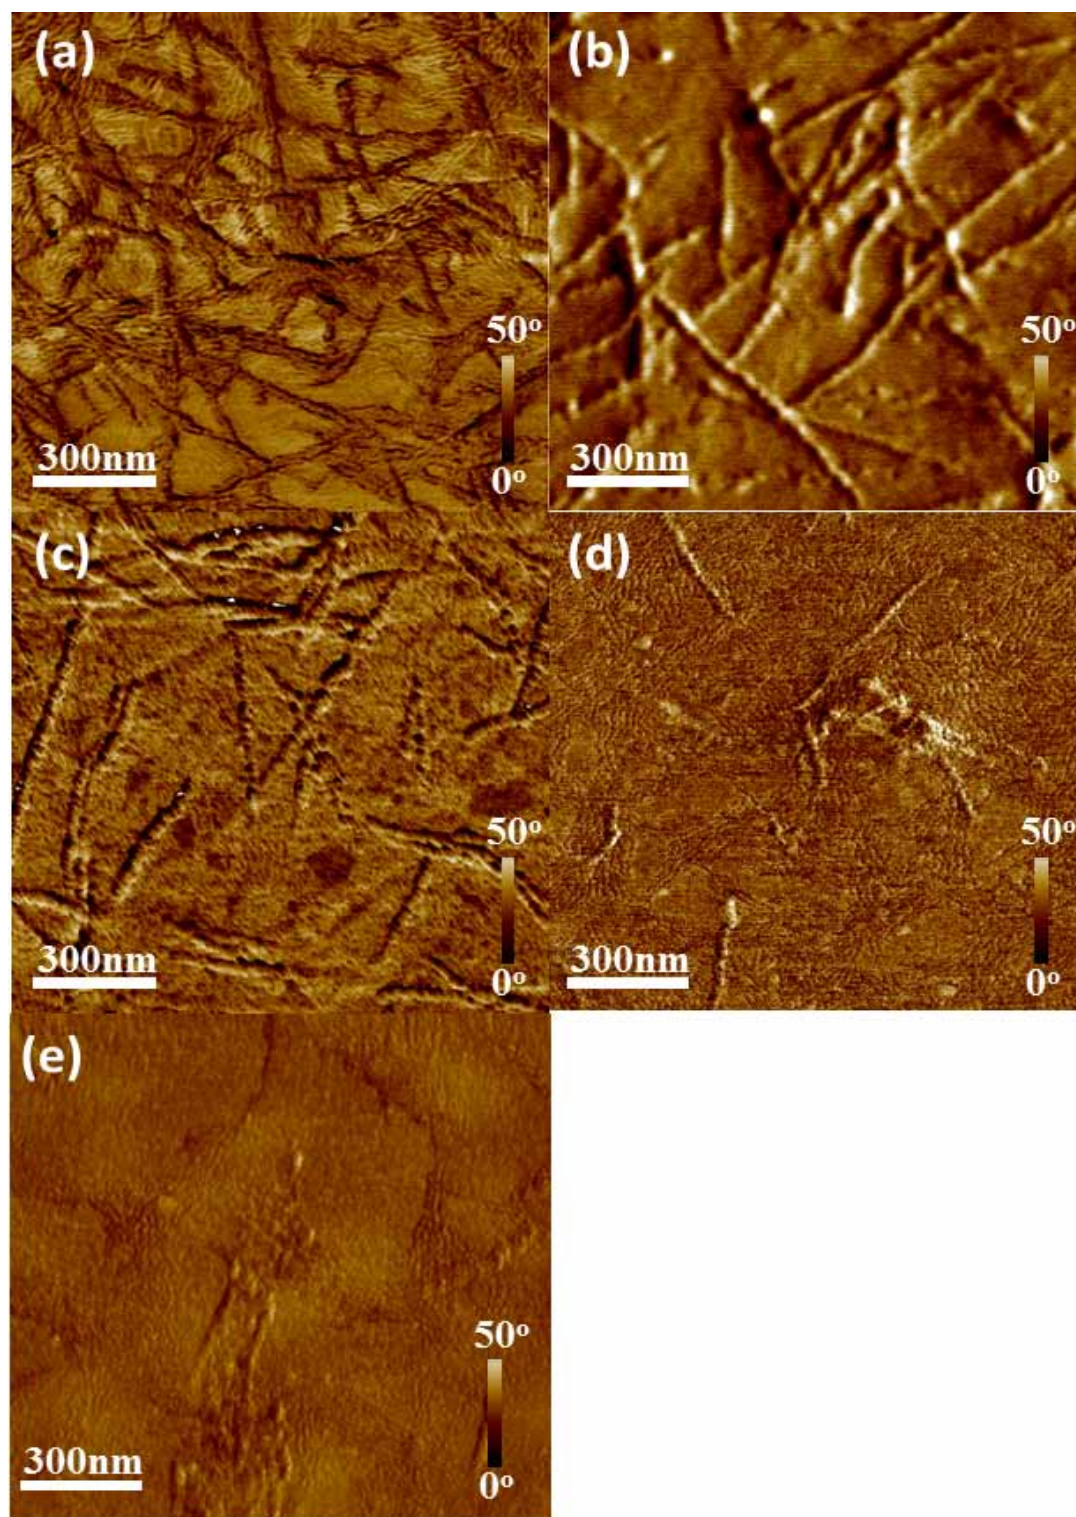

**Fig. S5.** AFM phase images of P3HT/PMMA blends prepared from  $\text{CH}_2\text{Cl}_2$  using various ratios of P3HT: (a) 50 wt%, (b) 20 wt%, (c) 10 wt%, (d) 5 wt% and (e) 2 wt%.

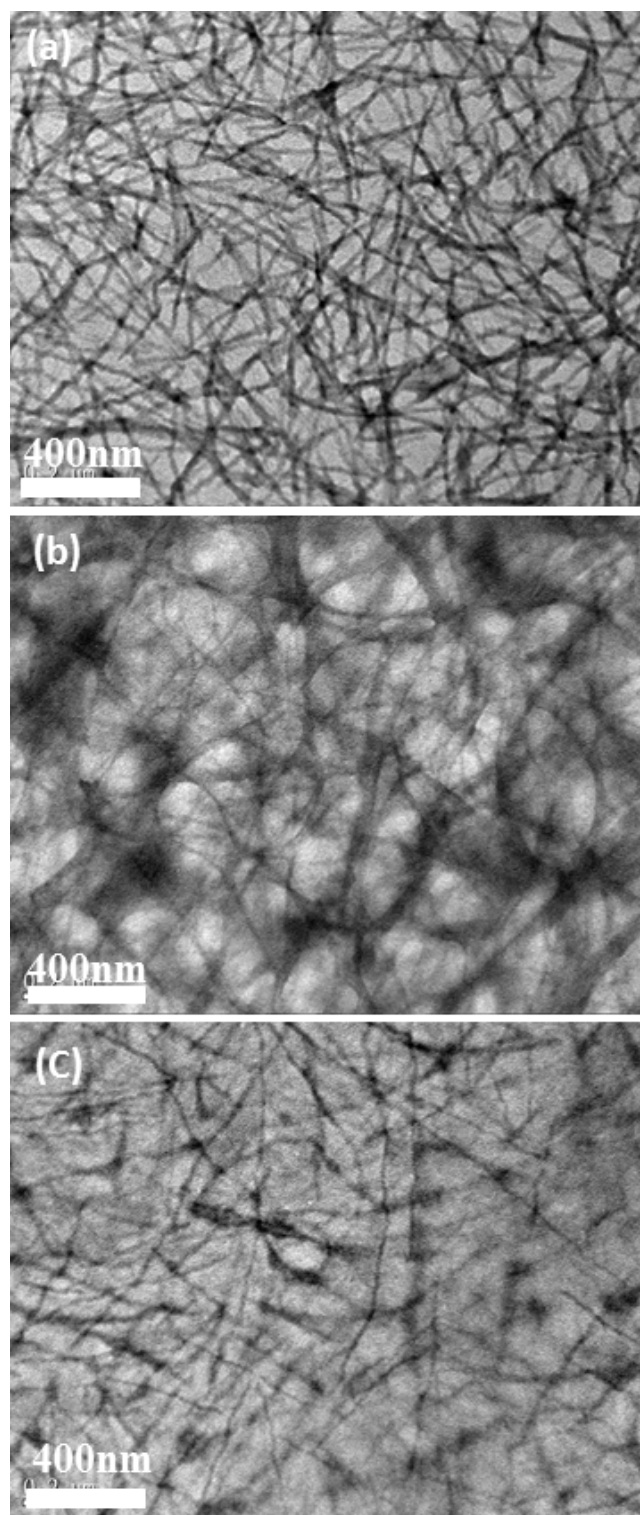

**Fig. S6.** TEM images of P3HT/PMMA blends prepared from  $\text{CH}_2\text{Cl}_2$  using various ratios of P3HT: (a) 50 wt%, (b) 20 wt%, (c) 10 wt%.

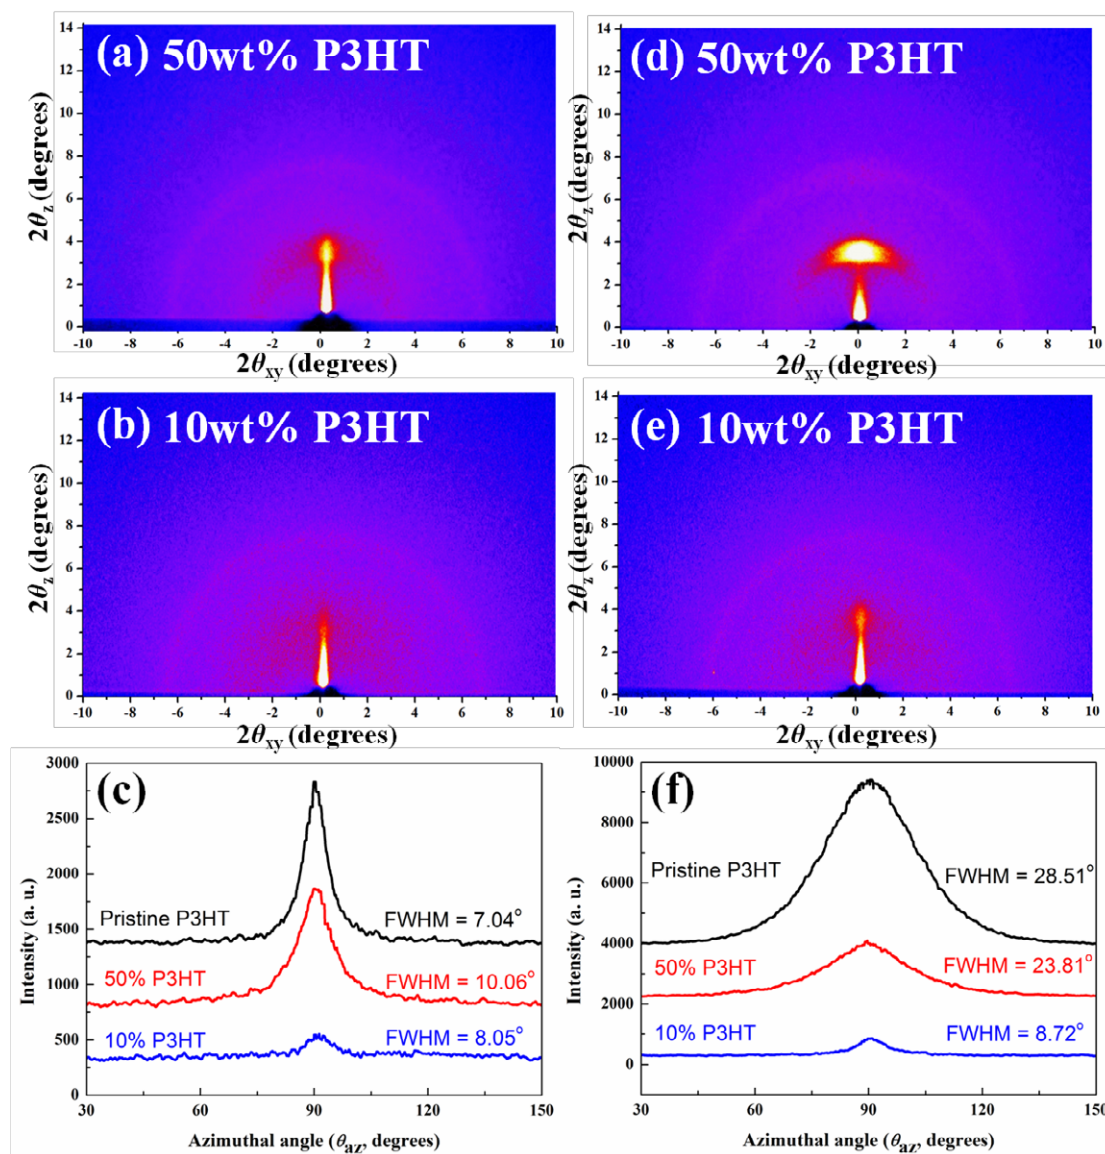

**Fig. S7.** 2D GIXD patterns of the P3HT/PMMA blends spin-coated from (a-c)  $\text{CHCl}_3$  and (d-f)  $\text{CH}_2\text{Cl}_2$  solutions in various ratios of P3HT: (a, d) 50wt%, (b, e) 10wt%. Azimuthal XRD profiles of the films at the (100) diffraction in  $\theta_z$  direction that prepared from (c)  $\text{CHCl}_3$  and (f)  $\text{CH}_2\text{Cl}_2$  solutions.

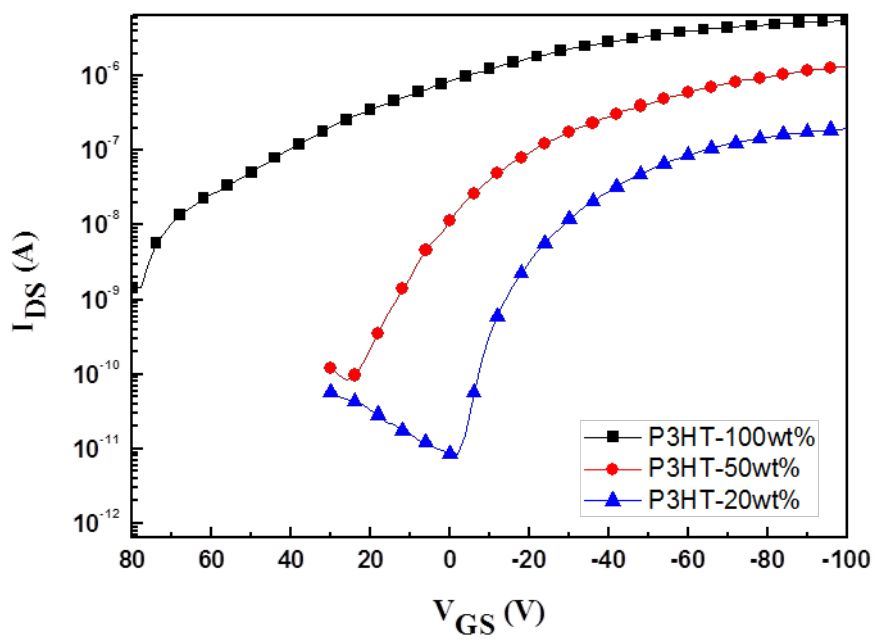

**Fig. S8.** Transfer characteristics of FET based on the P3HT/PSA blends prepared from the  $\text{CHCl}_3$  solutions.

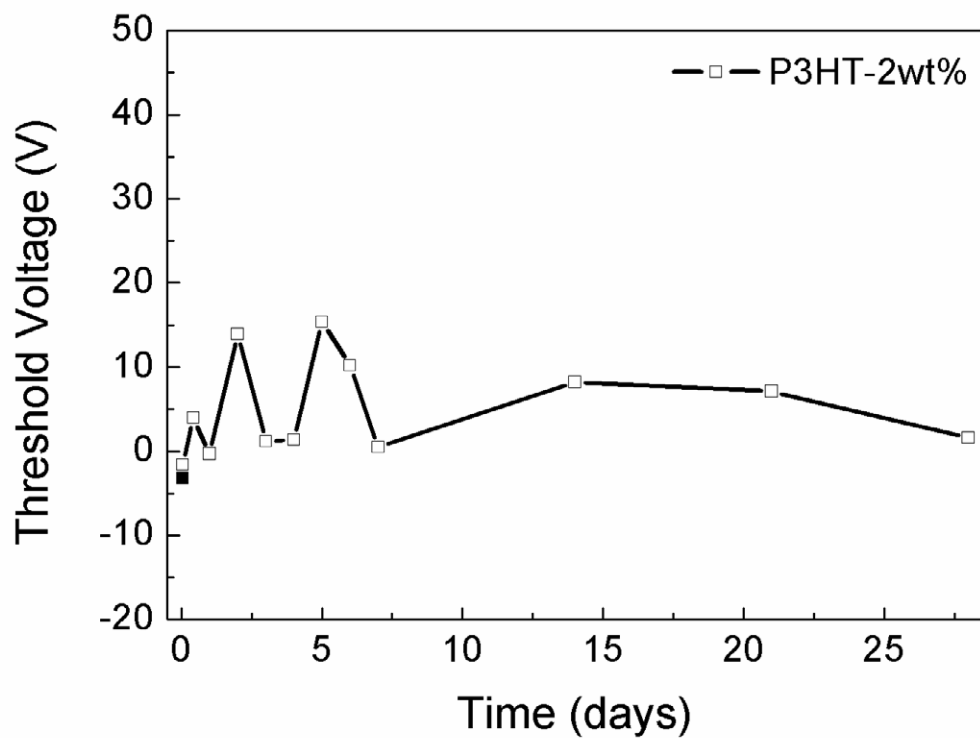

**Fig. S9.** Threshold voltages of P3HT/PSA (2/98) (square) and pristine P3HT (up triangle) as a function of time after exposed to air. The solid symbols correspond to an electrical performance in a nitrogen glove box. The threshold voltages of pristine P3HT increased larger than 200 V in air.
